# Supplementary material
Source: publisher figshare collection journal article supplement (https://acs.figshare.com/ndownloader/files/4594411)
Supplement: Supplementary file 1 [file 4594411]

## Supplementary Information

For

### Synthesis of N-Confused Tetraphenylporphyrin Rhodium Complexes Having Versatile Metal Oxidation States

Alagar Srinivasan,<sup>a</sup> Motoki Toganoh,<sup>a</sup> Teppei Niino,<sup>a</sup> Atsuhiko Osuka,<sup>b</sup> and  
Hiroyuki Furuta<sup>a,c\*</sup>

<sup>a</sup>Department of Chemistry and Biochemistry, Graduate School of Engineering, Kyushu University, 744 Motoooka, Nishi-ku, Fukuoka 819-0395, Japan.

Fax: (+81)92-802-2865; Tel: (+81)92-802-2865

E-mail: hfuruta@cstf.kyushu-u.ac.jp

<sup>b</sup>Department of Chemistry, Graduate School of Science, Kyoto University, Kyoto 606-8502, Japan.

<sup>c</sup>PRESTO, Japan Science and Technology Cooperation (JST), 4-1-8 Honcho, Kawaguchi 332-0012, Japan.

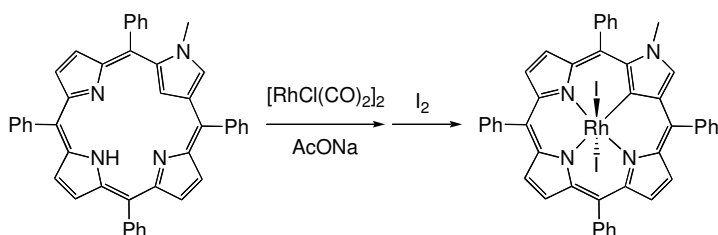

**Scheme S1.** Preparation of Rh(N-Me-NCTPP)I<sub>2</sub>.

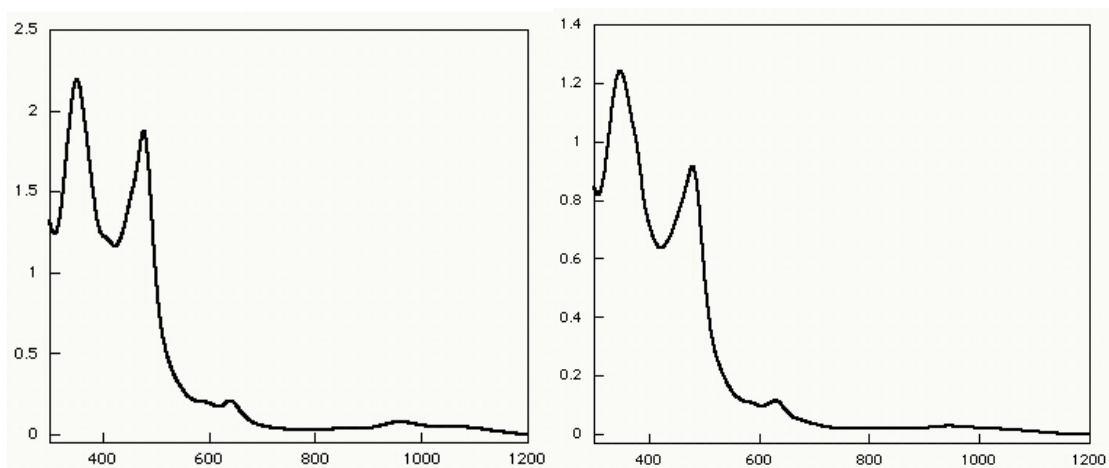

**Fig. S1.** UV/vis spectra of Rh(NCTPP)I<sub>2</sub> (left) and Rh(N-Me-NCTPP)I<sub>2</sub> (right) in CH<sub>2</sub>Cl<sub>2</sub> at 23 °C.
